# Supplementary material for: Organic aerosol components observed in Northern Hemispheric datasets from Aerosol Mass Spectrometry
Source: Copernicus journal article supplement (doi:10.5194/acp-10-4625-2010), 2010-05-20
Supplement: Supplementary file 1 [file acp-10-4625-2010-supplement.pdf]

## Supplementary Material

### Organic Aerosol Components observed in Northern Hemispheric Datasets from Aerosol Mass Spectrometry

N. L. Ng<sup>1</sup>, M. R. Canagaratna<sup>1\*</sup>, Q. Zhang<sup>2#</sup>, J. L. Jimenez<sup>3,4</sup>, J. Tian<sup>2</sup>, I. M. Ulbrich<sup>3,4</sup>, J. H. Kroll<sup>1,5</sup>, K. S. Docherty<sup>3,4</sup>, P. S. Chhabra<sup>6</sup>, R. Bahreini<sup>3,7</sup>, S. M. Murphy<sup>7</sup>, J. H. Seinfeld<sup>6</sup>, L. Hildebrandt<sup>8</sup>, N. M. Donahue<sup>8</sup>, P. F. DeCarlo<sup>3,9,10</sup>, V. A. Lanz<sup>10</sup>, A. S. H. Prevot<sup>10</sup>, E. Dinar<sup>11</sup>, Y. Rudich<sup>11</sup>, D. R. Worsnop<sup>1</sup>

1. Aerodyne Research, Inc. Billerica, MA, USA
2. Atmospheric Sciences Research Center, State University of New York, Albany, NY, USA
3. CIRES, University of Colorado, Boulder, CO, USA
4. Department of Chemistry and Biochemistry, University of Colorado, Boulder, CO, USA
5. Department of Civil and Environmental Engineering, Massachusetts Institute of Technology, Cambridge, MA, USA
6. Department of Chemical Engineering, California Institute of Technology, Pasadena, CA, USA
7. NOAA, Earth System Research Laboratory, Boulder, CO, USA
8. Center for Atmospheric Particle Studies, Carnegie Mellon University, Pittsburgh, PA, USA
9. Department of Atmospheric and Oceanic Science, University of Colorado, Boulder, CO, USA
10. Laboratory of Atmospheric Chemistry, Paul Scherrer Institut, Villigen, Switzerland
11. Department of Environmental Sciences, Weizmann Institute of Science, Rehovot 76100, Israel

# Now at Department of Environmental Toxicology, University of California, Davis, CA, USA

\*Author to whom correspondence should be addressed.

Phone (978) 663 9500 x 285, fax (978) 663 4918, e-mail [mrcana@aerodyne.com](mailto:mrcana@aerodyne.com)

Table S1: Summary of the location, time, duration, and previous publications of the AMS datasets that are analyzed in this study, Zhang et al. (2007a) and Jimenez et al. (2009).  
 Note: Site type 1 = urban, Site type 2 = urban downwind/rural/remote.

| Location            | Field Campaign | Site type | Time Period             | Duration | Season | Previous Publications                                                 |
|---------------------|----------------|-----------|-------------------------|----------|--------|-----------------------------------------------------------------------|
| Boulder, CO, USA    | BFS            | 1         | 6/7/2003 - 6/20/2003    | 14 days  | Su     | Nemitz et al.(2008)                                                   |
| New York City, USA  | PMTACS         | 1         | 1/7/2004 - 2/6/2004     | 30 days  | W      | Weimer et al. (2006)                                                  |
| Manchester, UK      |                | 1         | 1/17/2002 - 1/28/2002   | 11 days  | W      | Allan et al. (2003a; 2003b)                                           |
| Riverside, CA, USA  | SOAR-1         | 1         | 7/14/2005 - 8/13/2005   | 30 days  | Su     | DeCarlo et al. (2006), Docherty et al. (2008), Cubison et al. (2008)  |
| Tokyo, Japan        |                | 1         | 7/23/2003 - 8/14/2003   | 23 days  | Su     | Takegawa et al. (2005; 2006)                                          |
| Beijing, China      |                | 1         | 7/9/2006 - 7/21/2006    | 12 days  | Su     | Sun et al. (2009)                                                     |
| Zurich, Switzerland |                | 1         | 7/14/2005 - 8/4/2005    | 21 days  | Su     | Lanz et al. (2007)                                                    |
| Pittsburgh, PA, USA | PAQS           | 1         | 9/6/2002 - 9/22/2002    | 15 days  | F      | Zhang et al. (2004; 2005a; 2005b; 2005c; 2007b) Ulbrich et al. (2009) |
| Mexico City, Mexico | MILAGRO        | 1         | 3/10/2006 - 3/30/2006   | 21 days  | Sp     | Aiken et al. (2008; 2009)                                             |
| Tokyo, Japan        |                | 1         | 1/20/2004 - 2/10/2004   | 20 days  | W      | Takegawa et al. (2005; 2006)                                          |
| Vancouver, Canada   | PACIFIC-2001   | 1         | 8/11/2001 - 8/24/2001   | 13 days  | Su     | Boudries et al. (2004), Alfarra et al. (2004)                         |
| New York City, USA  | PMTACS         | 1         | 6/30/2001 - 8/5/2001    | 36 days  | Su     | Drewnick et al. (2004a; 2004b)                                        |
| Edinburgh, UK       |                | 1         | 10/31/2000 - 11/10/2000 | 10 days  | F      | Allan et al. (2003a; 2003b)                                           |
| Mainz, Germany      |                | 1         | 9/16/2004 - 10/1/2004   | 15 days  | F      | Vester et al. (2007)                                                  |

|                                                  |                 |   |                                                             |         |         |                                                                          |
|--------------------------------------------------|-----------------|---|-------------------------------------------------------------|---------|---------|--------------------------------------------------------------------------|
| Houston, TX,<br>USA                              | TexAQS-<br>2000 | 1 | 8/15/2000<br>-<br>9/15/2000                                 | 31 days | Su - F  | Tanaka et al.(2003)                                                      |
| Manchester, UK                                   |                 | 1 | 6/14/2001<br>-<br>6/25/2001                                 | 11 days | Su      | Allan et al. (2003a;<br>2003b)                                           |
| Duke Forest, NC,<br>USA                          |                 | 2 | 9/13/2004<br>-<br>9/21/2004                                 | 7 days  | F       |                                                                          |
| Hyytiälä,<br>southern Finland                    | QUEST           | 2 | 3/19/2003<br>-<br>4/13/2003                                 | 25 days | Sp      | Allan et al. (2006)                                                      |
| Chelmsford, UK                                   | TORCH-1         | 2 | 7/29/2003<br>-<br>8/31/2003                                 | 33 days | Su      | Cubison et al. (2006)                                                    |
| Taunus,<br>Germany                               |                 | 2 | 7/14/2004<br>- 8/4/2004                                     | 21 days | Su      | Dusek et al. (2006),<br>Hings et al., (2007)                             |
| Cruise track<br>along East coast<br>of USA, Leg1 | NEAQS1          | 2 | 7/18/2002<br>-<br>7/26/2002;<br>7/29/2002<br>-<br>8/10/2002 | 21 days | Su      | De Gouw et al. (2005),<br>Marcolli et al. (2006),<br>Bates et al. (2005) |
| Thompson Farm,<br>NH, USA                        |                 | 2 | 7/9/2005 -<br>8/15/2005                                     | 38 days | Su      | Cottrell et al. (2008)                                                   |
| Cruise track<br>along East coast<br>of USA, Leg2 | NEAQS2          | 2 | 7/29/2002<br>-<br>8/10/2002                                 | 13 days | Su      | De Gouw et al. (2005),<br>Marcolli et al. (2006),<br>Bates et al. (2005) |
| Pinnacle State<br>Park, NY, USA                  |                 | 2 | 7/14/2004<br>- 8/5/2004                                     | 22 days | Su      | Bae et al. (2006)                                                        |
| Fukue Island,<br>Japan                           |                 | 2 | 3/18/2003<br>- 4/3/2003                                     | 16 days | Sp      | Takami et al. (2005)                                                     |
| Fukue Island,<br>Japan                           |                 | 2 | 4/3/2003 -<br>4/16/2003                                     | 13 days | Sp      | Takami et al. (2005)                                                     |
| Fukue Island,<br>Japan                           |                 | 2 | 5/10/2003<br>- 6/3/2003                                     | 24 days | Sp - Su | Takami et al. (2005)                                                     |
| Chebogue Pt.,<br>Nova Scotia,<br>Canada          | ICARTT          | 2 | 7/7/2004 -<br>8/14/2004                                     | 38 days | Su      | Williams et al. (2007)                                                   |
| North Norfolk<br>Coastline                       | TORCH-2         | 2 | 4/25/200-<br>5/26/2004                                      | 31 days | Sp      | Gysel et al. (2007)                                                      |
| Okinawa Island,<br>Japan                         |                 | 2 | 10/3/2003<br>-<br>10/28/2003                                | 25 days | F       | Miyoshi et al. (2009)                                                    |
| Okinawa Island,<br>Japan                         |                 | 2 | 10/28/2003<br>-<br>12/2/2003                                | 35 days | F - W   | Miyoshi et al. (2009)                                                    |
| Okinawa Island,<br>Japan                         |                 | 2 | 12/2/2003<br>-<br>12/24/2003                                | 22 days | W       | Miyoshi et al. (2009)                                                    |

|                          |          |   |                             |         |    |                       |
|--------------------------|----------|---|-----------------------------|---------|----|-----------------------|
| Okinawa Island,<br>Japan |          | 2 | 3/13/2004<br>- 4/8/2004     | 26 days | Sp | Miyoshi et al. (2009) |
| Okinawa Island,<br>Japan |          | 2 | 4/8/2004 -<br>4/27/2004     | 19 days | Sp | Miyoshi et al. (2009) |
| Cheju Island,<br>Korea   | ACE-Asia | 2 | 4/11/2001<br>-<br>4/30/2001 | 19 days | Sp | Topping et al. (2004) |

Table S2: Summary of the location, time, and previous publications of the AMS datasets in Lanz et al. (2009) and from other sites (Crete and Egbert). Note: Site type 1 = urban, Site type 2 = urban downwind/rural/remote.

| Location                                                   | Site type | Time Period                                    | Season | Previous Publications     |
|------------------------------------------------------------|-----------|------------------------------------------------|--------|---------------------------|
| Rhine Valley,<br>Switzerland,<br>Austria,<br>Liechtenstein | 2         | 2/16/2007-<br>2/22/2007;2/8/2008-<br>2/13/2008 | Wi     | Weimer et al. (2009)      |
| Zurich ,<br>Switzerland                                    | 1         | 1/6/2006-1/25/2006                             | Wi     | Lanz et al. (2008)        |
| Grenoble,<br>France                                        | 1         | 1/14/2009-1/30/2009                            | Wi     | Favez et al. (2009)       |
| Massongex,<br>Switzerland                                  | 2         | 11/23/2006-<br>12/17/2006                      | Wi     | Perron et al. (2010)      |
| Harkingen,<br>Switzerland                                  | 2         | 5/12/2005-5/30/2005                            | Sp     |                           |
| Reiden,<br>Switzerland                                     | 2         | 1/27/2006-2/13/2006                            | Wi     |                           |
| Roveredo,<br>Switzerland                                   | 2         | 3/1/2005-3/15/2005                             | Sp     | Alfarra et al. (2007)     |
| Roveredo,<br>Switzerland                                   | 2         | 11/25/2005-<br>12/15/2005                      | Wi     | Alfarra et al. (2007)     |
| Payerne,<br>Switzerland                                    | 2         | 5/31/2006-7/3/2006                             | Su     |                           |
| Payerne,<br>Switzerland                                    | 2         | 1/12/2007-2/17/2007                            | Wi     |                           |
| Hohenpeissenberg,<br>Germany                               | 2         | 5/19/2002-5/31/2002                            | Su     | Hock et al. (2008)        |
| Jungfrauoch,<br>Switzerland                                | 2         | 4/30/2008-5/29/2008                            | Sp     |                           |
| Finakolia (Crete),<br>Greece                               | 2         | 5/8/2009-6/5/2009                              | Su     | Hildebrandt et al. (2009) |
| Egbert, Canada                                             | 2         | 5/14/2007-6/15/2007                            | Su     | Slowik et al. (2009)      |

## References

- Aiken, A. C., Decarlo, P. F., Kroll, J. H., Worsnop, D. R., Huffman, J. A., Docherty, K. S., Ulbrich, I. M., Mohr, C., Kimmel, J. R., Sueper, D., Sun, Y., Zhang, Q., Trimborn, A., Northway, M., Ziemann, P. J., Canagaratna, M. R., Onasch, T. B., Alfarra, M. R., Prevot, A. S. H., Dommen, J., Duplissy, J., Metzger, A., Baltensperger, U., and Jimenez, J. L.: O/C and OM/OC ratios of primary, secondary, and ambient organic aerosols with high-resolution time-of-flight aerosol mass spectrometry, *Environ. Sci. Technol.*, 42, 4478-4485, 2008.
- Aiken, A. C., Salcedo, D., Cubison, M. J., Huffman, J. A., DeCarlo, P. F., Ulbrich, I. M., Docherty, K. S., Sueper, D., Kimmel, J. R., Worsnop, D. R., Trimborn, A., Northway, M., Stone, E. A., Schauer, J. J., Volkamer, R. M., Fortner, E., de Foy, B., Wang, J., Laskin, A., Shutthanandan, V., Zheng, J., Zhang, R., Gaffney, J., Marley, N. A., Paredes-Miranda, G., Arnott, W. P., Molina, L. T., Sosa, G., and Jimenez, J. L.: Mexico City aerosol analysis during MILAGRO using high resolution aerosol mass spectrometry at the urban supersite (T0) - Part 1: Fine particle composition and organic source apportionment, *Atmos. Chem. Phys.*, 9, 6633-6653, 2009.
- Alfarra, M. R., Coe, H., Allan, J. D., Bower, K. N., Boudries, H., Canagaratna, M. R., Jimenez, J. L., Jayne, J. T., Garforth, A. A., Li, S. M., and Worsnop, D. R.: Characterization of urban and rural organic particulate in the lower Fraser valley using two aerodyne aerosol mass spectrometers, *Atmos. Environ.*, 38, 5745-5758, 2004.
- Alfarra, M. R., Prevot, A. S. H., Szidat, S., Sandradewi, J., Weimer, S., Lanz, V. A., Schreiber, D., Mohr, M., and Baltensperger, U.: Identification of the mass spectral signature of organic aerosols from wood burning emissions, *Environ. Sci. Technol.*, 41, 5770-5777, 2007.
- Allan, J. D., Alfarra, M. R., Bower, K. N., Williams, P. I., Gallagher, M. W., Jimenez, J. L., McDonald, A. G., Nemitz, E., Canagaratna, M. R., Jayne, J. T., Coe, H., and Worsnop, D. R.: Quantitative sampling using an Aerodyne aerosol mass spectrometer: 2. Measurements of fine particulate chemical composition in two UK cities (vol 108, art no 4091, 2003), *J. Geophys. Res.-Atmos.*, 108, 2003a.
- Allan, J. D., Jimenez, J. L., Williams, P. I., Alfarra, M. R., Bower, K. N., Jayne, J. T., Coe, H., and Worsnop, D. R.: Quantitative sampling using an Aerodyne aerosol mass spectrometer: 1. Techniques of data interpretation and error analysis (vol 108, art no 4090, 2003), *J. Geophys. Res.-Atmos.*, 108, 2003b.
- Allan, J. D., Alfarra, M. R., Bower, K. N., Coe, H., Jayne, J. T., Worsnop, D. R., Aalto, P. P., Kulmala, M., Hyotylainen, T., Cavalli, F., and Laaksonen, A.: Size and composition measurements of background aerosol and new particle growth in a Finnish forest during QUEST 2 using an Aerodyne Aerosol Mass Spectrometer, *Atmos. Chem. Phys.*, 6, 315-327, 2006.
- Bae, M. S., Demerjian, K. L., and Schwab, J. J.: Seasonal estimation of organic mass to organic carbon in PM<sub>2.5</sub> at rural and urban locations in New York state, *Atmos. Environ.*, 40, 7467-7479, 2006.
- Bates, T. S., Quinn, P. K., Coffman, D. J., Johnson, J. E., and Middlebrook, A. M.: Dominance of organic aerosols in the marine boundary layer over the Gulf of Maine during NEAQS 2002 and their role in aerosol light scattering, *J. Geophys. Res.-Atmos.*, 110, 2005.

Boudries, H., Canagaratna, M. R., Jayne, J. T., Alfarra, M. R., Allan, J., Bower, K. N., Coe, H., Pryor, S. C., Jimenez, J. L., Brook, J. R., Li, S., and Worsnop, D. R.: Chemical and physical processes controlling the distribution of aerosols in the Lower Fraser Valley, Canada, during the Pacific 2001 field campaign, *Atmos. Environ.*, 38, 5759-5774, 2004.

Cottrell, L. D., Griffin, R. J., Jimenez, J. L., Zhang, Q., Ulbrich, I., Ziemba, L. D., Beckman, P. J., Sive, B. C., and Talbot, R. W.: Submicron particles at Thompson Farm during ICARTT measured using aerosol mass spectrometry, *J. Geophys. Res.-Atmos.*, 113, 2008.

Cubison, M. J., Alfarra, M. R., Allan, J., Bower, K. N., Coe, H., McFiggans, G. B., Whitehead, J. D., Williams, P. I., Zhang, Q., Jimenez, J. L., Hopkins, J., and Lee, J.: The characterisation of pollution aerosol in a changing photochemical environment, *Atmos. Chem. Phys.*, 6, 5573-5588, 2006.

Cubison, M. J., Ervens, B., Feingold, G., Docherty, K. S., Ulbrich, I. M., Shields, L., Prather, K., Hering, S., and Jimenez, J. L.: The influence of chemical composition and mixing state of Los Angeles urban aerosol on CCN number and cloud properties, *Atmos. Chem. Phys.*, 8, 5649-5667, 2008.

de Gouw, J. A., Middlebrook, A. M., Warneke, C., Goldan, P. D., Kuster, W. C., Roberts, J. M., Fehsenfeld, F. C., Worsnop, D. R., Canagaratna, M. R., Pszenny, A. A. P., Keene, W. C., Marchewka, M., Bertman, S. B., and Bates, T. S.: Budget of organic carbon in a polluted atmosphere: Results from the New England Air Quality Study in 2002, *J. Geophys. Res.-Atmos.*, 110, D16305, doi:16310.11029/12004JD005623, 2005.

DeCarlo, P. F., Kimmel, J. R., Trimborn, A., Northway, M. J., Jayne, J. T., Aiken, A. C., Gonin, M., Fuhrer, K., Horvath, T., Docherty, K., Worsnop, D. R., and Jiménez, J. L.: A Field-Deployable High-Resolution Time-of-Flight Aerosol Mass Spectrometer, *Anal. Chem.*, 78, 8281-8289, 2006.

Docherty, K. S., Stone, E. A., Ulbrich, I. M., DeCarlo, P. F., Snyder, D. C., Schauer, J. J., Peltier, R. E., Weber, R. J., Murphy, S. M., Seinfeld, J. H., Grover, B. D., Eatough, D. J., and Jimenez, J. L.: Apportionment of Primary and Secondary Organic Aerosols in Southern California during the 2005 Study of Organic Aerosols in Riverside (SOAR-1), *Environ. Sci. Technol.*, 42, 7655-7662, 2008.

Drewnick, F., Jayne, J. T., Canagaratna, M., Worsnop, D. R., and Demerjian, K. L.: Measurement of ambient aerosol composition during the PMTACS-NY 2001 using an aerosol mass spectrometer. Part II: Chemically speciated mass distributions, *Aerosol Sci. Technol.*, 38, 104-117, 2004a.

Drewnick, F., Schwab, J. J., Jayne, J. T., Canagaratna, M., Worsnop, D. R., and Demerjian, K. L.: Measurement of ambient aerosol composition during the PMTACS-NY 2001 using an aerosol mass spectrometer. Part I: Mass concentrations, *Aerosol Sci. Technol.*, 38, 92-103, 2004b.

Dusek, U., Frank, G. P., Hildebrandt, L., Curtius, J., Schneider, J., Walter, S., Chand, D., Drewnick, F., Hings, S., Jung, D., Borrmann, S., and Andreae, M. O.: Size matters more than chemistry for cloud-nucleating ability of aerosol particles, *Science*, 312, 1375-1378, 2006.

Favez, O., Haddad, I. E., Piot, C., Boréave, A., Abidi, E., Marchand, N., Jaffrezo, J.-L., esombes, J.-L., Personnaz, M.-B., Sciare, J., Wortham, H., George, C., and D'Anna, B.: Inter-comparison of source apportionment models for the estimation of wood burning

aerosols during wintertime in an Alpine city (Grenoble, France), atmospheric Chemistry and Physics Discussions, submitted, 2009.

Gysel, M., Crosier, J., Topping, D. O., Whitehead, J. D., Bower, K. N., Cubison, M. J., Williams, P. I., Flynn, M. J., McFiggans, G. B., and Coe, H.: Closure study between chemical composition and hygroscopic growth of aerosol particles during TORCH2, *Atmos. Chem. Phys.*, 7, 6131-6144, 2007.

Hildebrandt, L., Engelhart, G. J., Mohr, C., Kostenidou, E., Lanz, V. A., Bougiatioti, A., DeCarlo, P. F., Prevot, A. S. H., Baltensperger, U., Mihalopoulos, N., Donahue, N. M., and Pandis, S. N.: Aged Organic Aerosol in the Eastern Mediterranean: The Finokalia Aerosol Measurement Experiment – 2008, in prep, 2009.

Hings, S. S., Walter, S., Schneider, J., Borrmann, S., and Drewnick, F.: Comparison of a quadrupole and a time-of-flight aerosol mass spectrometer during the Feldberg aerosol characterization experiment 2004, *Aerosol Sci. Technol.*, 41, 679-691, 2007.

Hock, N., Schneider, J., Borrmann, S., Rompp, A., Moortgat, G., Franze, T., Schauer, C., Pöschl, U., Plass-Dulmer, C., and Berresheim, H.: Rural continental aerosol properties and processes observed during the Hohenpeissenberg Aerosol Characterization Experiment (HAZE2002), *Atmos. Chem. Phys.*, 8, 603-623, 2008.

Jimenez, J. L., Canagaratna, M. R., and Donahue, N. M. et. al.: Evolution of Organic Aerosols in the Atmosphere, *Science*, 326, 1525-1529, DOI: 10.1126/science.1180353, 2009.

Lanz, V. A., Alfarra, M. R., Baltensperger, U., Buchmann, B., Hueglin, C., and Prévôt, A. S. H.: Source apportionment of submicron organic aerosols at an urban site by factor analytical modelling of aerosol mass spectra, *Atmos. Chem. Phys.*, 7, 1503-1522, 2007.

Lanz, V. A., Alfarra, M. R., Baltensperger, U., Buchmann, B., Hueglin, C., Szidat, S., Wehrli, M. N., Wacker, L., Weimer, S., Caseiro, A., Puxbaum, H., and Prevot, A. S. H.: Source attribution of submicron organic aerosols during wintertime inversions by advanced factor analysis of aerosol mass spectra, *Environ. Sci. Technol.*, 42, 214-220, 2008.

Marcollì, C., Canagaratna, M. R., Worsnop, D. R., Bahreini, R., de Gouw, J. A., Warneke, C., Goldan, P. D., Kuster, W. C., Williams, E. J., Lerner, B. M., Roberts, J. M., Meagher, J. F., Fehsenfeld, F. C., Marchewka, M., Bertman, S. B., and Middlebrook, A. M.: Cluster analysis of the organic peaks in bulk mass spectra obtained during the 2002 New England air quality study with an Aerodyne aerosol mass spectrometer, *Atmos. Chem. Phys.*, 6, 5649-5666, 2006.

Miyoshi, T., Takami, A., Shimono, A., and S., H.: Characteristics of aerosol chemical compositions measured with an aerosol mass spectrometer at Cape Hedo, Okinawa --- Seasonal variations and transformation during transport, *J. Geophys. Res.-Atmos.*, submitted, 2009.

Nemitz, E., Jimenez, J. L., Huffman, J. A., Ulbrich, I. M., Canagaratna, M. R., Worsnop, D. R., and Guenther, A. B.: An eddy-covariance system for the measurement of surface/atmosphere exchange fluxes of submicron aerosol chemical species - First application above an urban area, *Aerosol Sci. Technol.*, 42, 636-657, 2008.

Perron, N., Sandradewi, J., Alfarra M. R. et al.: Composition and sources of particulate matter in an industrialised Alpine valley, *Atmos. Chem. Phys. Discuss.*, 10, 9391-9430, 2010



Slowik, J. G., Stroud, C., Bottenheim, J. W., Brickell, P. C., Chang, R. Y.-W., Liggió, J., Makar, P. A., Martin, R. V., Moran, M. D., Shantz, N. C., Sjostedt, S. J., Donkelaar, A. v., Vlasenko, A., Wiebe, H. A., Xia, A. G., Zhang, J., Leitch, W. R., and Abbatt, J. P. D.: Characterization of a large biogenic secondary organic aerosol event from eastern Canadian forests, *Atmospheric Chemistry and Physics Discussions*, 9, 18113–18158, 2009.

Sun, J., Zhang, Q., Canagaratna, M. R., Zhang, Y., Ng, N. L., Sun, Y., Jayne, J. T., Zhang, X., Zhang, X., and Worsnop, D. R.: Highly Time- and Size-Resolved Characterization of Submicron Aerosol Particles in Beijing Using an Aerodyne Aerosol Mass Spectrometer, *Atmos. Environ.*, 44, 131-140, 2009.

Takami, A., Miyoshi, T., Shimono, A., and Hatakeyama, S.: Chemical composition of fine aerosol measured by AMS at Fukue Island, Japan during APEX period, *Atmos. Environ.*, 39, 4913-4924, 2005.

Takegawa, N., Miyazaki, Y., Kondo, Y., Komazaki, Y., Miyakawa, T., Jimenez, J. L., Jayne, J. T., Worsnop, D. R., Allan, J. D., and Weber, R. J.: Characterization of an Aerodyne Aerosol Mass Spectrometer (AMS): Intercomparison with other aerosol instruments, *Aerosol Sci. Technol.*, 39, 760-770, 2005.

Takegawa, N., Miyakawa, T., Kondo, Y., Jimenez, J. L., Zhang, Q., Worsnop, D. R., and Fukuda, M.: Seasonal and diurnal variations of submicron organic aerosol in Tokyo observed using the Aerodyne aerosol mass spectrometer, *J. Geophys. Res.-Atmos.*, 111, 2006.

Tanaka, P. L., Riemer, D. D., Chang, S. H., Yarwood, G., McDonald-Buller, E. C., Apel, E. C., Orlando, J. J., Silva, P. J., Jimenez, J. L., Canagaratna, M. R., Neece, J. D., Mullins, C. B., and Allen, D. T.: Direct evidence for chlorine-enhanced urban ozone formation in Houston, Texas, *Atmos. Environ.*, 37, 1393-1400, 2003.

Topping, D., Coe, H., McFiggans, G., Burgess, R., Allan, J., Alfarra, M. R., Bower, K., Choularton, T. W., Decesari, S., and Facchini, M. C.: Aerosol chemical characteristics from sampling conducted on the Island of Jeju, Korea during ACE Asia, *Atmos. Environ.*, 38, 2111-2123, 2004.

Ulbrich, I. M., Canagaratna, M. R., Zhang, Q., Worsnop, D. R., and Jimenez, J. L.: Interpretation of organic components from Positive Matrix Factorization of aerosol mass spectrometric data, *Atmos. Chem. Phys.*, 9, 2891-2918, 2009.

Vester, B. P., Ebert, M., Barnert, E. B., Schneider, J., Kandler, K., Schutz, L., and Weinbruch, S.: Composition and mixing state of the urban background aerosol in the Rhein-Main area (Germany), *Atmos. Environ.*, 41, 6102-6115, 2007.

Weimer, S., Drewnick, F., Högrefe, O., Schwab, J. J., Rhoads, K., Orsini, D., Canagaratna, M., Worsnop, D. R., and Demerjian, K. L.: Size-selective nonrefractory ambient aerosol measurements during the Particulate Matter Technology Assessment and Characterization Study - New York 2004 Winter Intensive in New York City, *J. Geophys. Res.-Atmos.*, 111, 2006.

Weimer, S., Mohr, C., and Lanz, V. A. et al.: Organic aerosol source apportionment using mass spectra from mobile measurements in the Rhine Valley, *Environ. Sci. Technol.*, submitted, 2009.

Williams, B. J., Goldstein, A. H., Millet, D. B., Holzinger, R., Kreisberg, N. M., Hering, S. V., White, A. B., Worsnop, D. R., Allan, J. D., and Jimenez, J. L.: Chemical speciation of organic aerosol during the International Consortium for Atmospheric Research on

Transport and Transformation 2004: Results from in situ measurements, *J. Geophys. Res.-Atmos.*, 112, D10S26, doi:10.1029/2006JD007601, 2007.

Zhang, Q., Stanier, C. O., Canagaratna, M. R., Jayne, J. T., Worsnop, D. R., Pandis, S. N., and Jimenez, J. L.: Insights into the chemistry of new particle formation and growth events in Pittsburgh based on aerosol mass spectrometry, *Environmental Science and Technology*, 38, 4797-4809, 2004.

Zhang, Q., Alfarra, M. R., Worsnop, D. R., Allan, J. D., Coe, H., Canagaratna, M. R., and Jimenez, J. L.: Deconvolution and quantification of hydrocarbon-like and oxygenated organic aerosols based on aerosol mass spectrometry, *Environmental Science and Technology*, 39, 4938-4952, 2005a.

Zhang, Q., Canagaratna, M. R., Jayne, J. T., Worsnop, D. R., and Jimenez, J. L.: Time- and size-resolved chemical composition of submicron particles in Pittsburgh: Implications for aerosol sources and processes, *J. Geophys. Res.-Atmos.*, 110, 2005b.

Zhang, Q., Worsnop, D. R., Canagaratna, M. R., and Jimenez, J. L.: Hydrocarbon-like and oxygenated organic aerosols in Pittsburgh: insights into sources and processes of organic aerosols, *Atmos. Chem. Phys.*, 5, 3289-3311, 2005c.

Zhang, Q., Jimenez, J. L., Canagaratna, M. R., Allan, J. D., Coe, H., Ulbrich, I., Alfarra, M. R., Takami, A., Middlebrook, A. M., Sun, Y. L., Dzepina, K., Dunlea, E., Docherty, K., DeCarlo, P. F., Salcedo, D., Onasch, T., Jayne, J. T., Miyoshi, T., Shimojo, A., Hatakeyama, S., Takegawa, N., Kondo, Y., Schneider, J., Drewnick, F., Borrmann, S., Weimer, S., Demerjian, K., Williams, P., Bower, K., Bahreini, R., Cottrell, L., Griffin, R. J., Rautiainen, J., Sun, J. Y., Zhang, Y. M., and Worsnop, D. R.: Ubiquity and dominance of oxygenated species in organic aerosols in anthropogenically-influenced Northern Hemisphere midlatitudes, *Geophys. Res. Lett.*, 34, L13801, doi:10.1029/2007GL029979, 2007a.

Zhang, Q., Jimenez, J. L., Worsnop, D. R., and Canagaratna, M.: A case study of urban particle acidity and its influence on secondary organic aerosol, *Environmental Science and Technology*, 41, 3213-3219, 2007b.
